# Supplementary material for: The Experience of Chinese Parents of Children with Language Development Delay(LDD) in Family Intervention under the ABC-X Model: A Qualitative Study
Source: Research Square preprint supplement (doi:10.21203/rs.3.rs-8408915/v1), 2025-12-24
Supplement: Supplementary file 1 [file c0e9ddbae1154a0a2291173c.docx]

**Supplementary material 1- interview guideline**

| **Interview guide** |
| --- |
| (1) From your perspective as a parent/caregiver, what is your overall understanding of the purpose, importance, and expected outcomes of rehabilitation training for children with LDD? Have you observed any changes in your child since starting training (e.g., language expression, communication willingness)?  (2) Could you describe in detail how you implement rehabilitation training for your child at home? This may include specific training content (e.g., vocabulary practice, conversational games), training frequency (e.g., daily/weekly sessions), duration per session, and how you adapt the training to your child’s mood or responsiveness.  (3) During the process of conducting home-based rehabilitation training, what specific challenges or difficulties have you encountered (e.g., low child compliance, unclear training methods, time constraints)? How did you attempt to address these problems, and what was the outcome of your solutions?  (4) Regarding your child’s rehabilitation training, what specific knowledge (e.g., evidence-based training techniques, progress assessment methods) or support (e.g., professional guidance, peer parent communication groups, resource access) do you consider most needed to improve your home-based training effectiveness?  (5) Beyond the topics discussed above, do you have any additional experiences, feelings, or suggestions related to family-based rehabilitation training for LDD children? For example, how has the training process affected your family life or your relationship with your child? |
